# Supplementary material for: The Effect of Covalently-Attached ATRP-Synthesized Polymers on Membrane Stability and Cytoprotection in Human Erythrocytes
Source: PubMed Central journal article supplement (PMC4917246; doi:10.1371/journal.pone.0157641), 2016-06-22
Supplement: pone.0157641.s001.pdf [file pone.0157641.s001.pdf]

# 1 **Supporting Materials**

## 2 **Materials and Methods**

3 *N*-hydroxysuccinimide (NHS), *N*-(3-dimethylaminopropyl)-*N*'-ethylcarbodiimide hydrochloride  
4 (EDC·HCl), 4-Amino-2,2,6,6-tetramethylpiperidine-1-oxyl (amino-TEMPO) copper (II) chloride  
5 ( $\text{CuCl}_2$ ), and dimethyl sulfoxide (DMSO) were purchased from Sigma-Aldrich (St Louis, MO).  
6 *N,N*-dimethylacrylamide (DMAA; Sigma-Aldrich) was distilled in the presence of calcium hydride  
7 under vacuum. DisulfoCy3-NHS was purchased from Cyandye (Sunny Isles Beach, FL). ATRP  
8 initiators, *N*-2-chloropropionyl- $\beta$ -alanine and *N*-(2-chloropropionyl)-4-butyric acid benzyl ester,  
9 were synthesized according to procedures reported by references [1] and [2] respectively. *N*-  
10 acryloyl-6-aminohexanoic acid (CAm) was synthesized according to procedure reported by  
11 reference [2]. Tris[2-(dimethylamino)ethyl]amine ( $\text{Me}_6\text{TREN}$ ) was prepared according to a  
12 procedure reported by reference [3].

13

## 14 **Measurements**

15  $^1\text{H}$  NMR spectra (S2-S4 Figs; S6 and S7 Figs) were recorded on a spectrometer (300 MHz) in  
16 the NMR facility located in Center for Molecular Analysis, Carnegie Mellon University, with  
17 Deuterium oxide ( $D_2O$ ). Routine FT-IR spectra were obtained with an ATI Mattson Infinity Series  
18 FT-IR spectrometer. UV-vis spectra were obtained using a UV-vis spectrometer (Lambda 2,  
19 PerkinElmer). Number average molecular weights ( $M_n$ ) and the polydispersity index ( $M_w/M_n$ )  
20 were estimated by gel permeation chromatography (GPC) on a Water 2695 Series with a data  
21 processor, equipped with three columns (Waters Ultrahydrogel Linier, 500 and 250), using 80  
22 vol % of 100 mM sodium phosphate buffer (pH 9.0) with 20 vol % acetonitrile as an eluent at a  
23 flow rate 1.0 mL/min, with detection by a refractive index (RI) detector. Polyethylene glycol  
24 standards were used for calibration. 2,4,6-trinitrobenzene sulfonic acid (TNBS) assay was  
25 carried out to determine amine groups of the polymer. TNBS solution (250  $\mu\text{L}$ , 0.1 % TNBS in

26 100 mM sodium phosphate buffer (pH 8.5)) was added into the polymer solution (500  $\mu$ L, 1.0  
27 mg / mL in 100 mM sodium phosphate buffer (pH 8.5)), then incubated at 37 °C for 2h. After  
28 adding water (375  $\mu$ L) to the incubated solution, the absorbance of the solution at 345 nm was  
29 measured by UV-vis spectrometer using PMMA cuvette. 4-Amino-2,2,6,6-tetramethylpiperidine-  
30 1-oxyl (amino-TEMPO) was used for calibration.

31

## 32 **Synthesis of P1**

33 *N*-2-chlorolpropionyl- $\beta$ -alanine as an ATRP initiator (18 mg, 0.1 mmol), DMAA (535  $\mu$ L, 5  
34 mmol), sodium ascorbate (40 mg, 0.2 mmol) in deionized water (20 mL) were placed in a  
35 polymerization flask. The polymerization solution was charged with nitrogen gas for 30 min and  
36 then nitrogen gas charged solution of Me<sub>6</sub>TREN (40  $\mu$ L, 0.15 mmol) and CuCl<sub>2</sub> (16 mg, 0.12  
37 mmol) in deionized water (1 mL) was added under nitrogen gas flow. The polymerization was  
38 carried out at 4 °C for 4h, then nitrogen gas charged amino-TEMPO (4-amino-2,2,6,6-  
39 tetramethylpiperidine-1-oxyl, 86 mg, 0.5 mmol) in deionized water (1 mL) was added under  
40 nitrogen gas flow. The solution was stirred at 4 °C overnight. The resulting mixture was isolated  
41 by dialysis with Mwco 1000 Da dialysis tube (Spectra/Por®, Spectrum Laboratories Inc.,  
42 Rancho Dominguez, CA) in deionized water overnight, and then the polymer was lyophilized.  
43 Number average molecular weight ( $M_n$ ) 6.5 kDa and the distributions ( $M_w/M_n$ ) 1.23 by GPC. IR  
44 (KBr) 3454, 2938, 1624, 1500, 1405, 1359, 1255, 1149, 1058 and 630  $\text{cm}^{-1}$ . 78 mol% of  
45 polymer end could be converted to amine group by chain termination of the polymerization  
46 using amino-TEMPO.

47

## 48 **Preparation of HO-pDMAA-Cy3**

49 Sulfo-Cyanine3 NHS ester (30 mg, 41  $\mu$ mol) was added in solution of the polymer (260 mg, 31  
50  $\mu$ mol of  $-\text{NH}_2$  end group) and trimethylamine (11  $\mu$ L, 80  $\mu$ mol) in DMSO (5 mL), and then stirred

51 at room temperature for 2 h. The polymer, **HO-pDMAA-Cy3**, was isolated by dialysis using an  
52 Mwco 1,000 Da dialysis tube in deionized water overnight, and then the polymer was  
53 lyophilized. Estimated molecular weight ( $M_n$ ) 7.0 kDa by  $^1\text{H}$  NMR spectrum. IR (KBr) 3434,  
54 2935, 1627, 1561, 1499, 1451, 1406, 1360, 1256, 1147, 1111, 1059, 1026, 931 and  $630\text{ cm}^{-1}$ .

55

### 56 **Preparation of NHS-pDMAA-Cy3**

57 EDC-HCl (46 mg, 240  $\mu\text{mol}$ ) and NHS (28 mg, 240  $\mu\text{mol}$ ) were then added to solution of the  
58 HOOC-pDMAA-Cy3 (170 mg, 24  $\mu\text{mol}$  of -COOH end group) in deionized water (10 mL) at  $0\text{ }^\circ\text{C}$   
59 and stirred at room temperature for 30 min. The polymer, **NHS-pDMAA-Cy3**, were isolated by  
60 dialysis using an Mwco 1,000 Da dialysis tube in the refrigerator and then lyophilized. Estimated  
61 molecular weight ( $M_n$ ) 7.1 kDa by  $^1\text{H}$  NMR spectrum. IR (KBr) 3454, 2937, 1811, 1773, 1734,  
62 1627, 1561, 1502, 1458, 1404, 1359, 1255, 1147, 1096, 1059, 1026, 931 and  $632\text{ cm}^{-1}$ .

63

### 64 **Preparation of P2**

65 Carboxyl group protected ATRP initiator (*N*-(2-chloropropionyl)-4-butyric acid benzyl ester, 56  
66 mg, 0.2 mmol), DMAA (1.03 mL, 10 mmol), sodium ascorbate (80 mg, 0.4 mmol) in ethanol (4  
67 mL) and deionized water (16 mL) were placed in a polymerization flask. The polymerization  
68 solution was charged with nitrogen gas for 30 min and then nitrogen gas charged solution of  
69  $\text{Me}_6\text{TREN}$  (60  $\mu\text{L}$ , 0.22 mmol) and  $\text{CuCl}_2$  (30 mg, 0.22 mmol) in deionized water (1 mL) was  
70 added under nitrogen gas flow. The polymerization was carried out at room temperature for 4 h,  
71 then nitrogen gas charged DMAA (618  $\mu\text{L}$ , 6.0 mmol), *N*-acryloyl-6-aminohexanoic acid, (CAm,  
72 740 mg, 4.0 mmol) and sodium hydrogen carbonate (336 mg, 4.0 mmol) in deionized water (10  
73 mL) was added under nitrogen gas flow. The solution was stirred at room temperature  
74 overnight. The resulting mixture was dialyzed by using an Mwco 1000 dialysis tube in deionized  
75 water overnight, and then the isolated polymer was lyophilized. Number average molecular

76 weight ( $M_n$ ) 7.0 kDa and the distributions ( $M_w/M_n$ ) 1.32 by GPC. IR (KBr) 3453, 2935, 2876,  
77 1725, 1720, 1626, 1500, 1460, 1405, 1360, 1257, 1146, 1057 and 622  $\text{cm}^{-1}$ . 4.9 of carboxyl  
78 groups per polymer chain were estimated by  $^1\text{H}$  NMR spectrum.

79

### 80 **Preparation of P3**

81 EDC-HCl (191 mg, 1.0 mmol) and NHS (115 mg, 1.0 mmol) were added to a solution of the  
82 obtained polymer (450 mg, 0.1 mmol polymers i.e. ca. 0.5 mmol of COOH groups) in acetonitrile  
83 (10 mL) at 0 °C then stirred at room temperature for 30 min. Amino-TEMPO (214 mg, 1.25  
84 mmol) was added to the reaction mixture and stirred at room temperature overnight. 1 N NaOH  
85 aq. (150  $\mu\text{L}$ ) was added to the mixture and stirred at room temperature for 2 h. The resulting  
86 polymer was lyophilized after isolated by dialysis using an Mwco 1000 dialysis tube in deionized  
87 water overnight. 3.1 TEMPO groups per polymer chain were estimated by  $^1\text{H}$  NMR spectrum.  
88 Estimated molecular weight ( $M_n$ ) 7.3 kDa by  $^1\text{H}$  NMR spectrum. IR (KBr) 3453, 2935, 2875,  
89 1626, 1500, 1460, 1405, 1360, 1256, 1148, 1057 and 631  $\text{cm}^{-1}$ .

90

### 91 **Preparation of NHS-pDMAA-TEMPO-**

92 EDC-HCl (96 mg, 0.5 mmol) and NHS (58 mg, 0.5 mmol) were then added to a solution of  
93 polymer (**P3**) (300 mg, 0.05 mmol of COOH group) in deionized water (10 mL) and stirred at  
94 room temperature for 30 min. The final polymer (**NHS-pDMAA-TEMPO-**) was isolated by  
95 dialysis using an Mwco 1000 dialysis tube in the refrigerator and then lyophilized. Estimated  
96 molecular weight ( $M_n$ ) 7.4 kDa by  $^1\text{H}$  NMR spectrum. IR (KBr) 3435, 2936, 2881, 1811, 1773,  
97 1734, 1627, 1502, 1459, 1435, 1404, 1359, 1255, 1208, 1147, 1057 and 633  $\text{cm}^{-1}$ .

98

### 99 **References**

100

- 101 1. Cummings C, Murata H, Koepsel R, Russell AJ (2014) Dramatically increased pH and  
102 temperature stability of chymotrypsin using dual block polymer-based protein  
103 engineering. *Biomacromolecules* 15: 763-771.
- 104 2. D'Souza S, Murata H, Jose MV, Askarova S, Yantsen Y, et al. (2014) Engineering of cell  
105 membranes with a bisphosphonate-containing polymer using ATRP synthesis for bone  
106 targeting. *Biomaterials* 35: 9447-9458.
- 107 3. Ciampolini M, Nardi N (1966) Five-coordinated high-spin complexes of bivalent cobalt, nickel,  
108 and copper with tris(2-dimethylaminoethyl)amine. *Inorg Chem* 5: 41-44.

## 109 Supporting Materials Figures

### 110 Figure A: Synthesis of NHS-pDMAA-Cy3

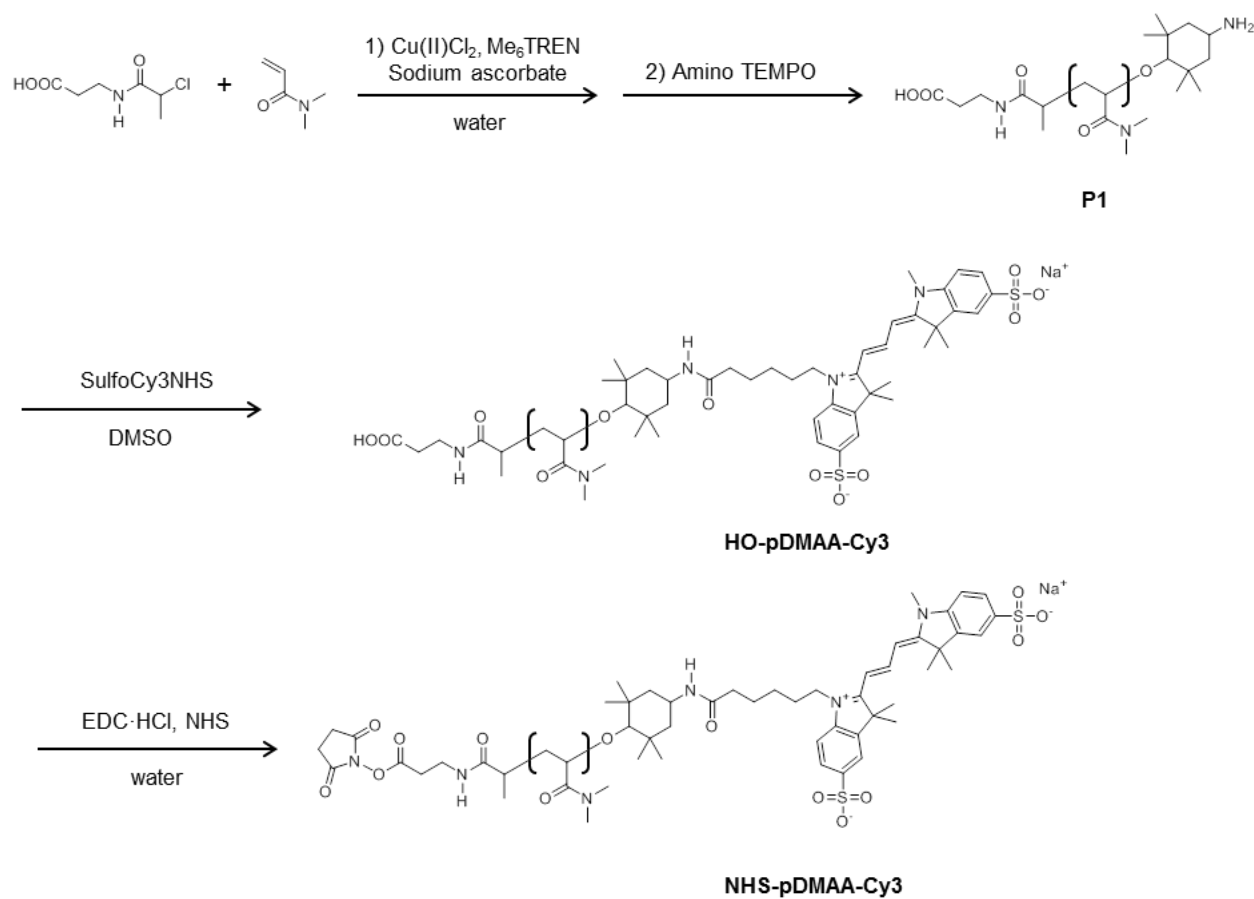

111

112

113 **Figure B:**  $^1\text{H}$  NMR of **P1** in  $\text{D}_2\text{O}$

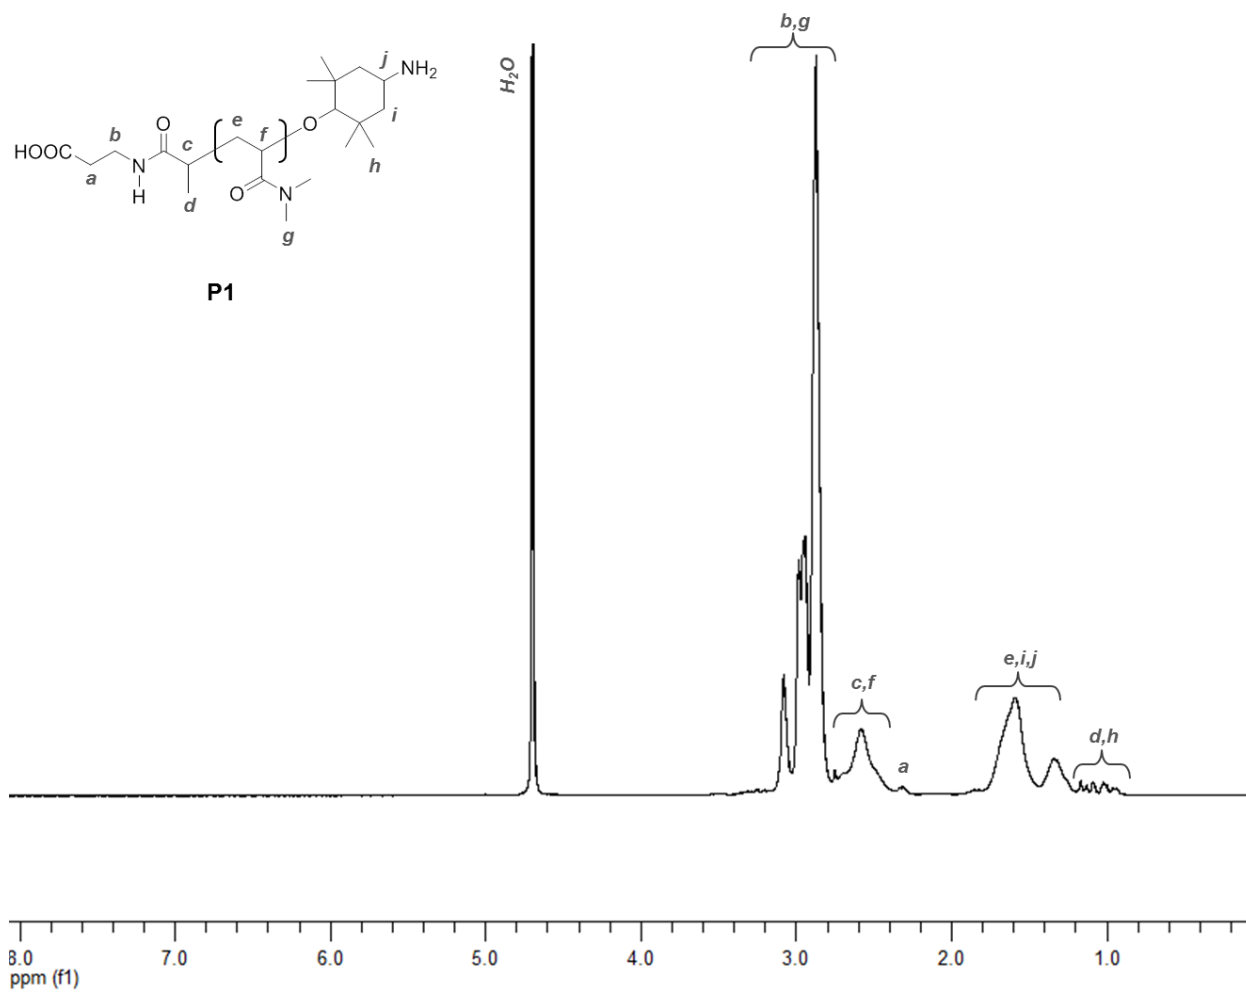

114

115

116 **Figure C:**  $^1\text{H}$  NMR of HO-pDMAA-Cy3 in  $D_2O$

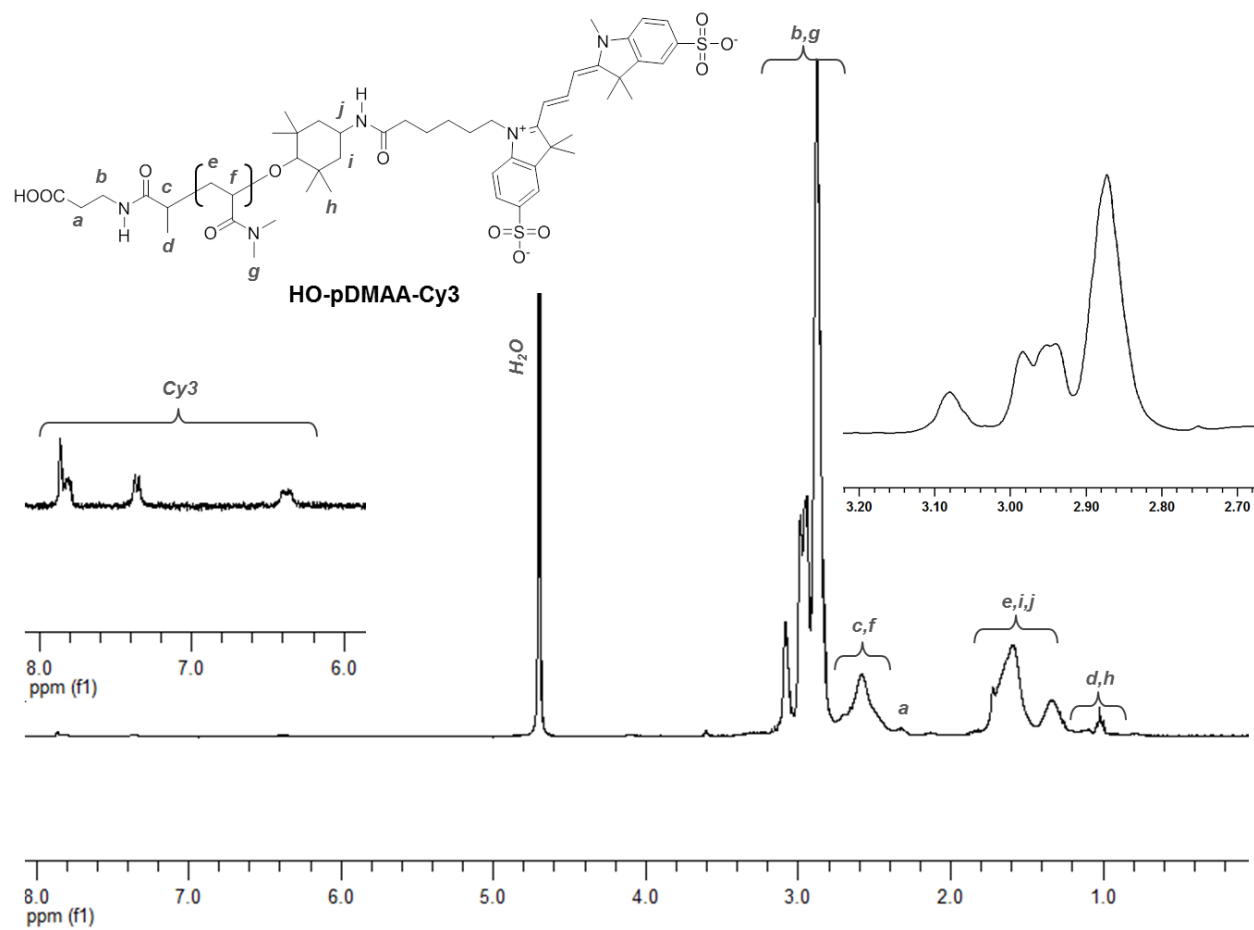

117

118

119 **Figure D:**  $^1\text{H}$  NMR of NHS-pDMAA-Cy3 in  $D_2\text{O}$

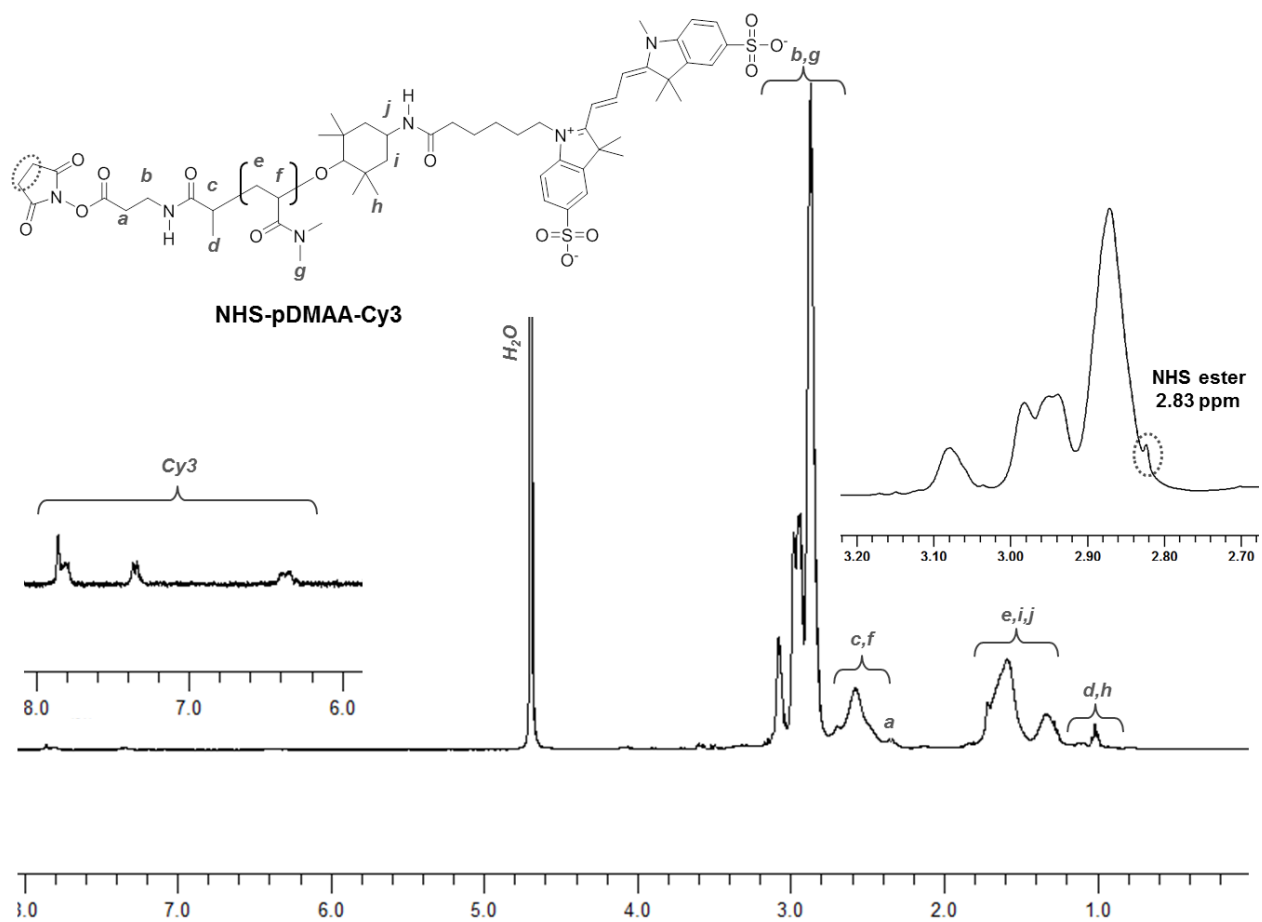

120

121



122 **Figure E: Synthesis of NHS-pDMAA-TEMPO.**

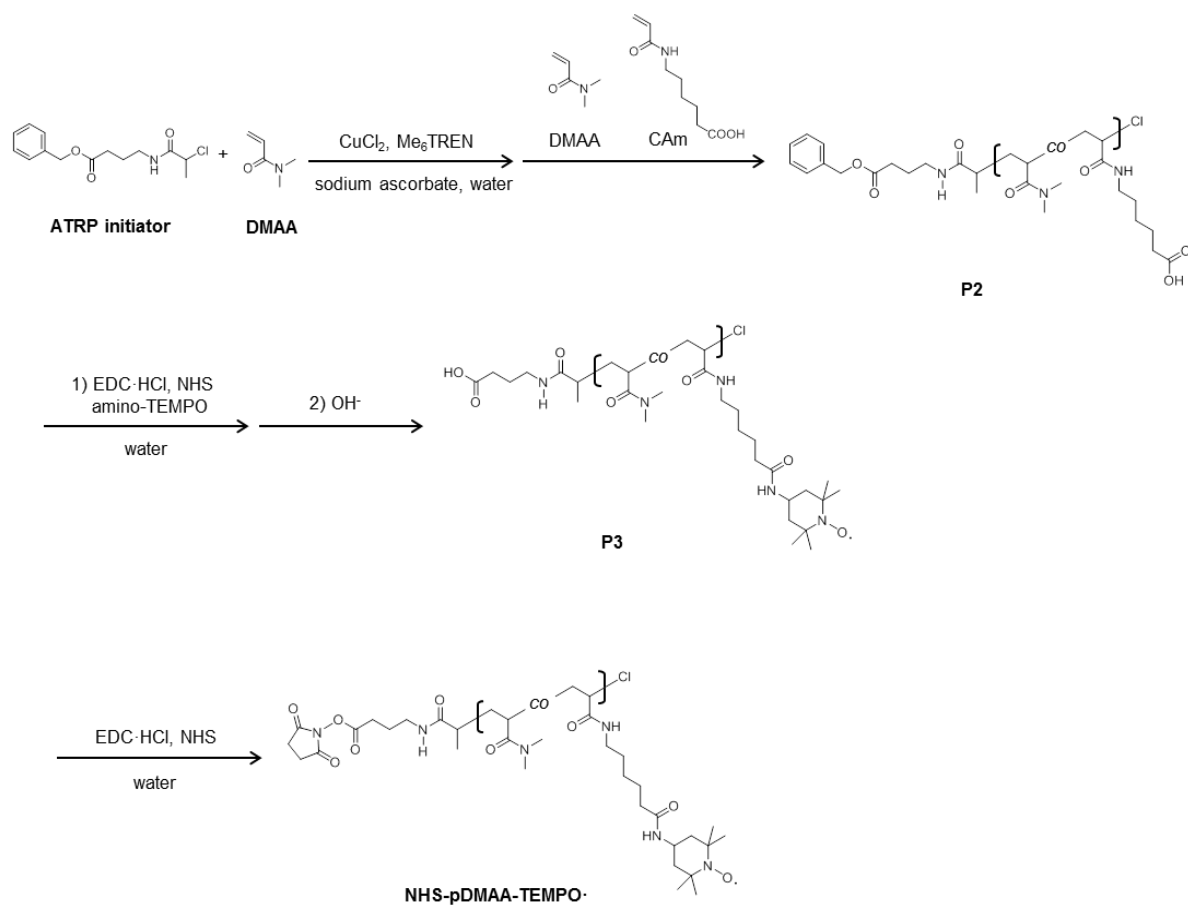

123

124 **Figure F:**  $^1\text{H}$  NMR of **P2** in  $\text{D}_2\text{O}$

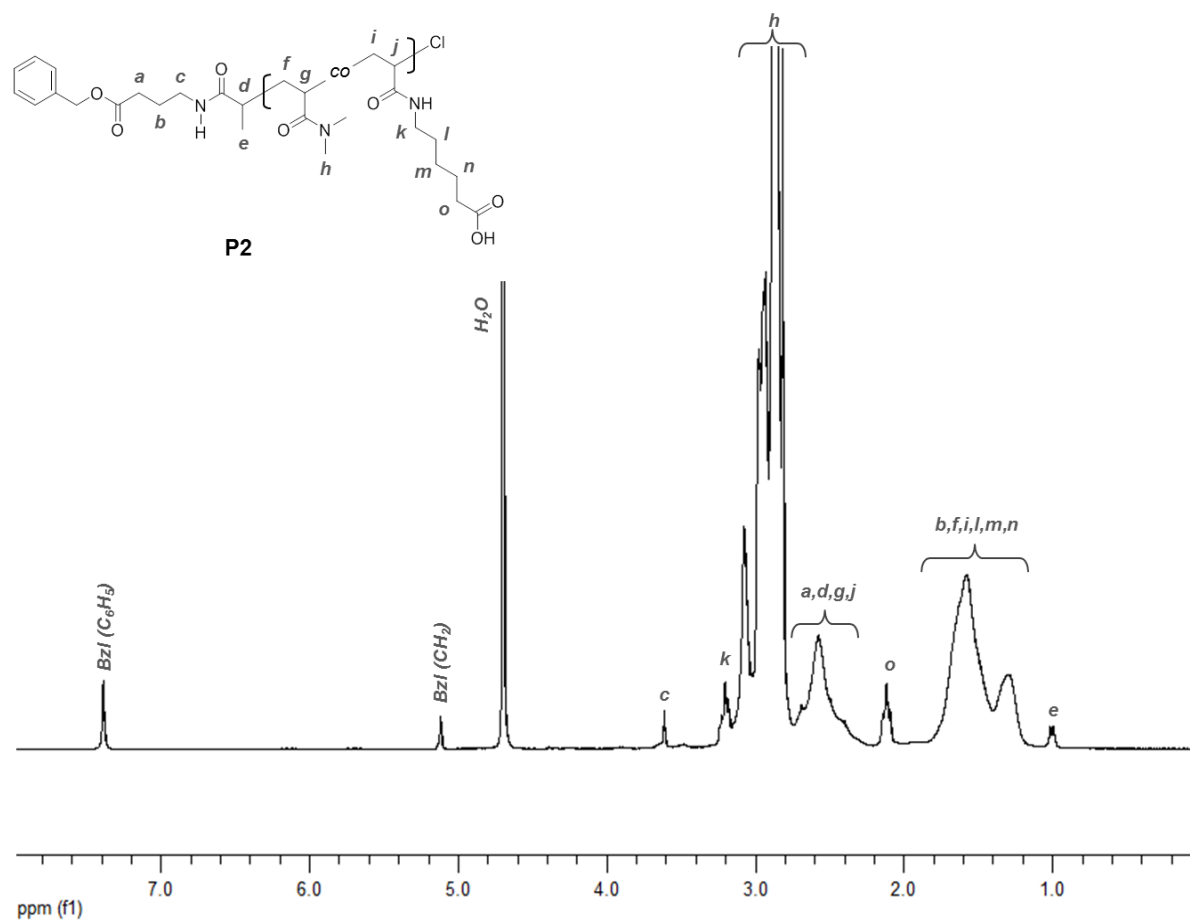

125

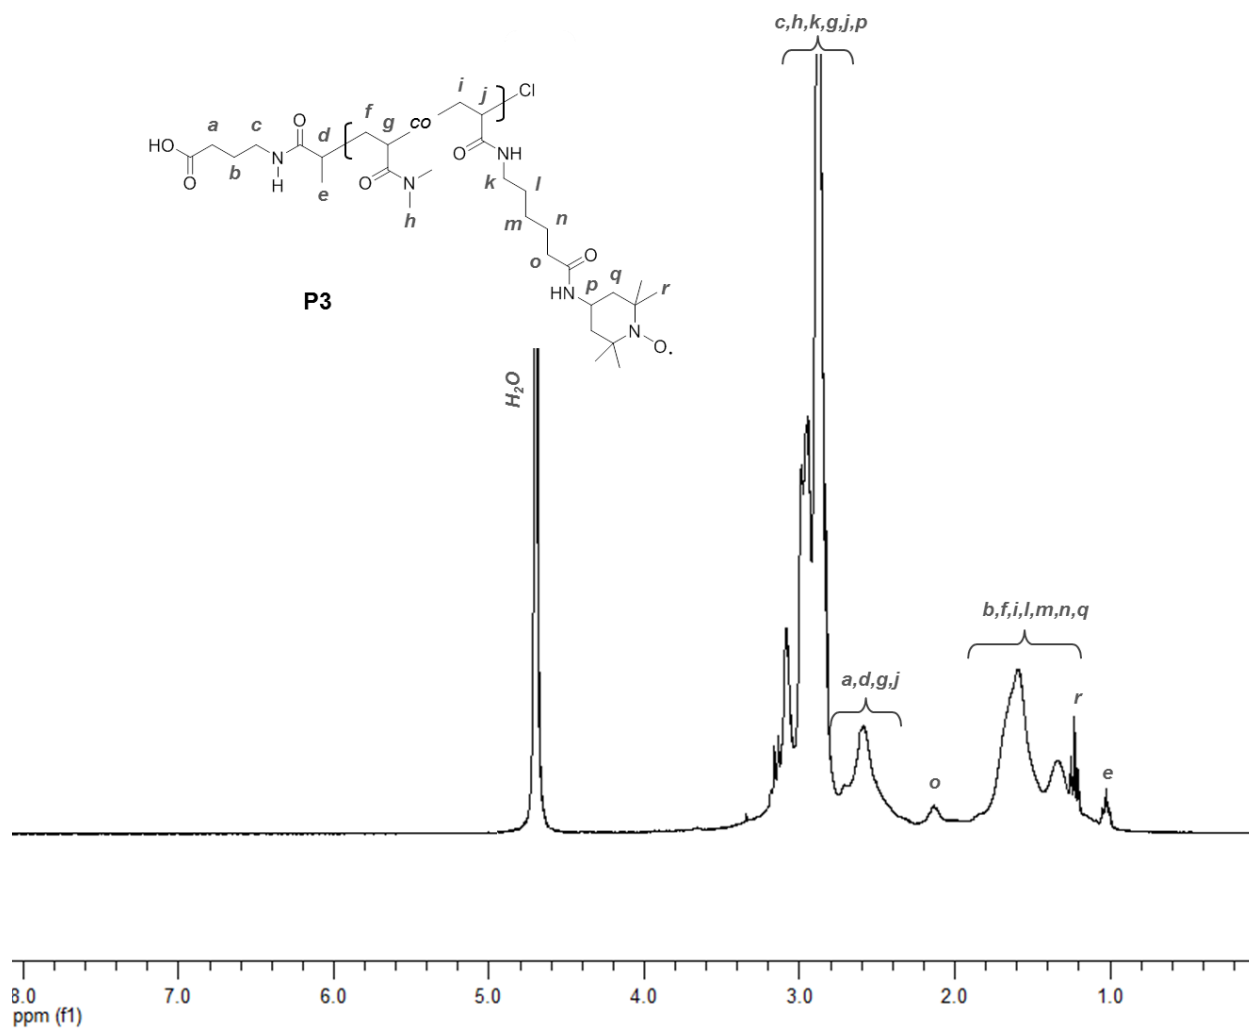

127  
128  
129  
130  
131  
132

Figure H. Additional Gels

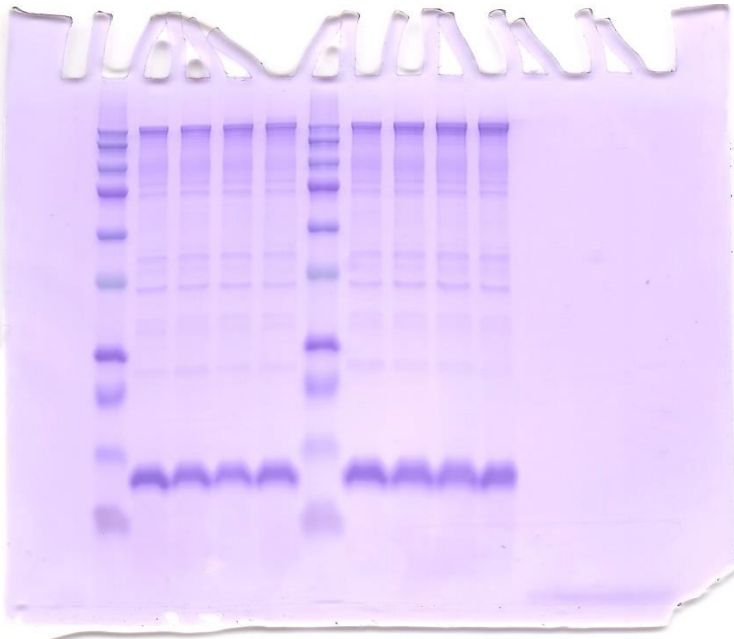

133

134

135 02252015 Trial 2 BS3 crosslinking of Band 3 in hRBC modified with NHS-Cy3

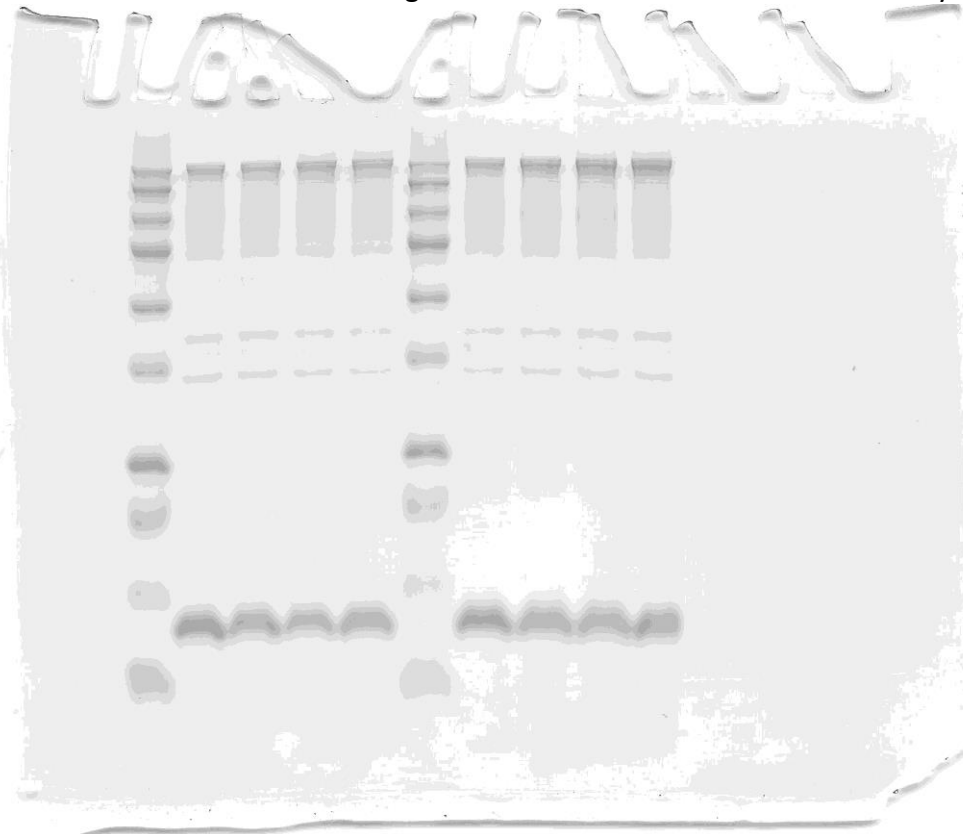

136

137

138 02252015 Trial 2 BS3 crosslinking of Band 3 in hRBC modified with NHS-Cy3 -Grey Scale

139

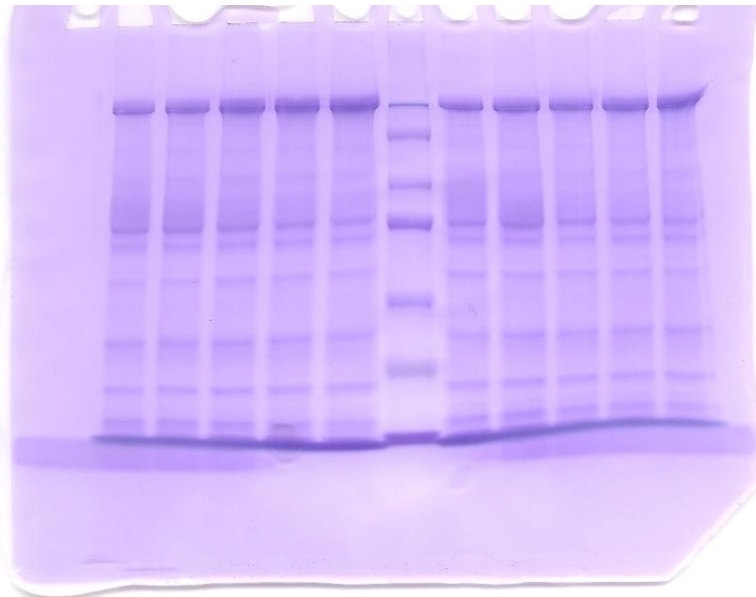

140

141

03132015 Trial 5 BS3 crosslinking of Band 3 in hRBC modified with NHS-Cy3

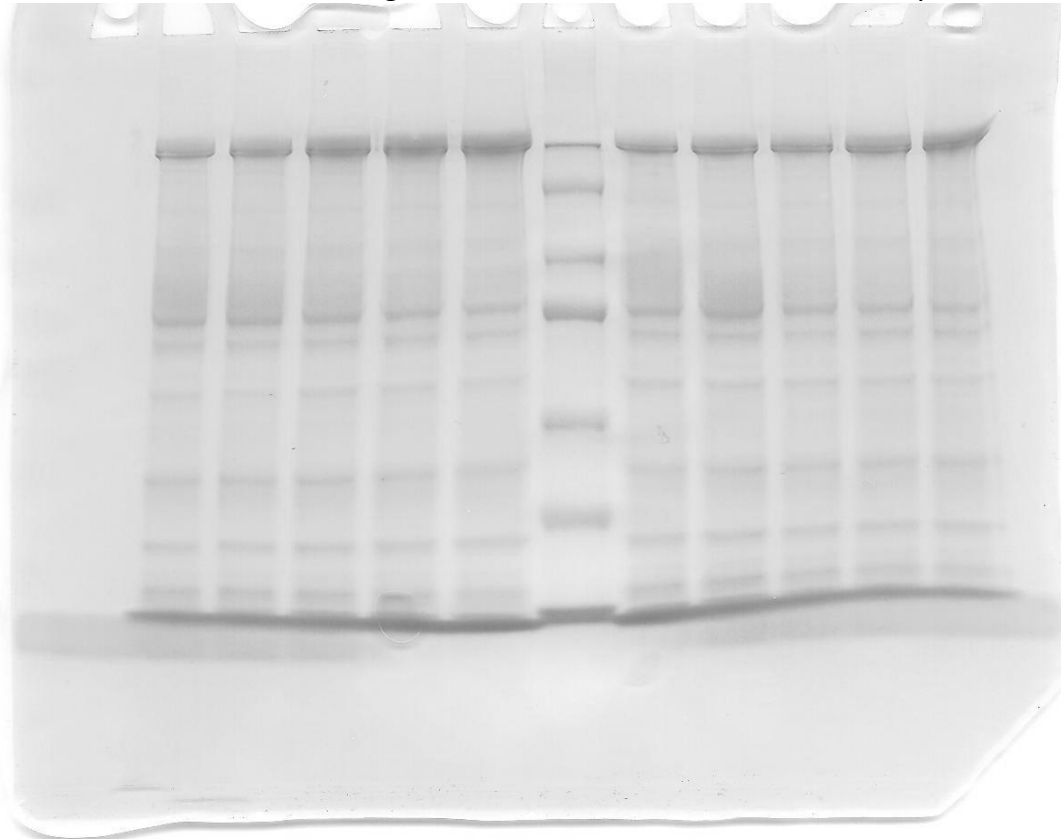

142

143

03132015 Trial 5 BS3 crosslinking of Band 3 in hRBC modified with NHS-Cy3- grey scale

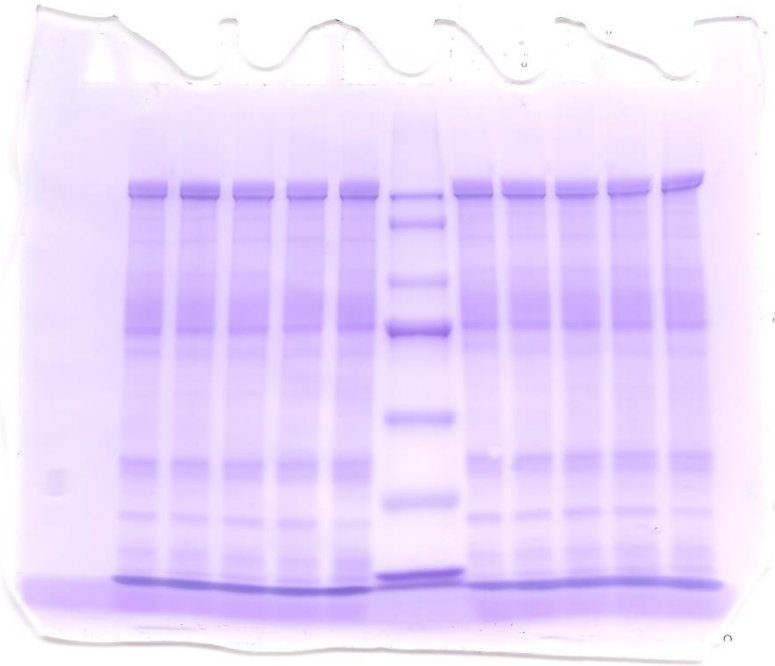

144  
145

03192015 Trial 7 BS3 crosslinking of Band 3 in hRBC modified with NHS-Cy3

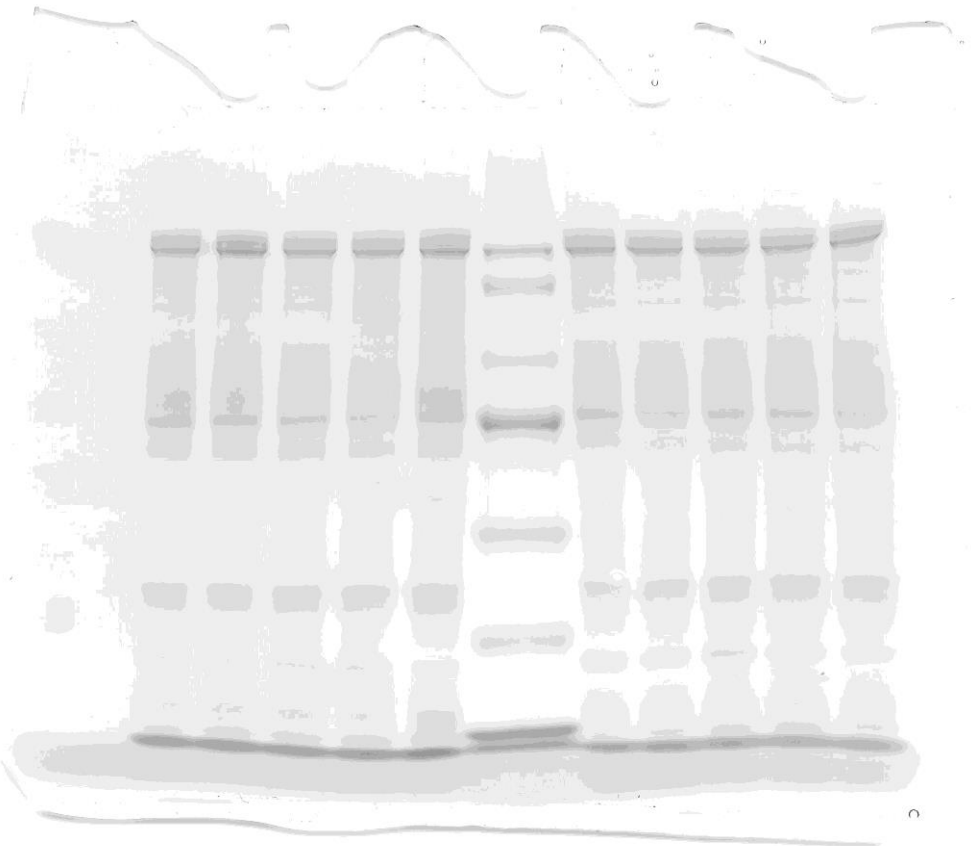

146  
147

03192015 Trial 7 BS3 crosslinking of Band 3 in hRBC modified with NHS-Cy3 grey scale
